# Supplementary material for: Healable and shape-memory dual functional polymers for reliable and multipurpose mechanical energy harvesting devices
Source: Royal Society of Chemistry journal article supplement (doi:10.1039/c9ta03382c), 2019-01-01
Supplement: c9ta03382c1.pdf [file c9ta03382c1.pdf]

## Supporting Information

### Healable and Shape-memory Dual Functional Polymers for Reliable and Multipurpose Mechanical Energy Harvesting Devices

*Wei Xu<sup>a</sup>, Man-Chung Wong<sup>a</sup>, Qiongyu Guo<sup>b</sup>, Tiezheng Jia<sup>c</sup>, Jianhua Hao<sup>a,\*</sup>*

<sup>a</sup>Department of Applied Physics, The Hong Kong Polytechnic University, Hong Kong, China

<sup>b</sup>Department of Biomedical Engineering, Southern University of Science and Technology, Shenzhen, Guangdong, China

<sup>c</sup>Department of Chemistry, Southern University of Science and Technology, Shenzhen, Guangdong, China

\*Correspondence should be addressed to: [jh.hao@polyu.edu.hk](mailto:jh.hao@polyu.edu.hk)

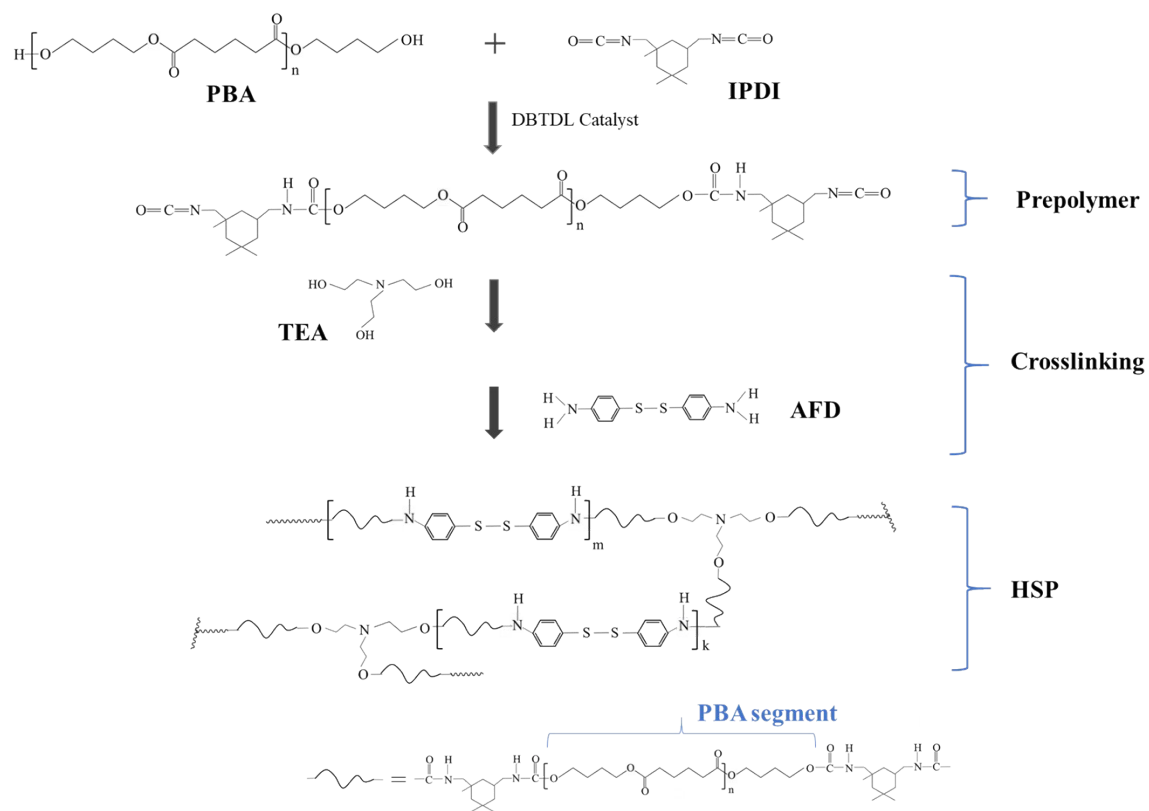

**Figure S1.** Schematic illustrating the preparation of HSP.

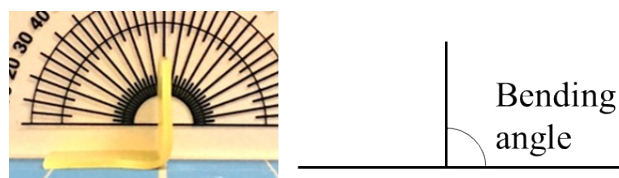

**Figure S2.** Schematic of bending angle during shape-memory process of HSP.

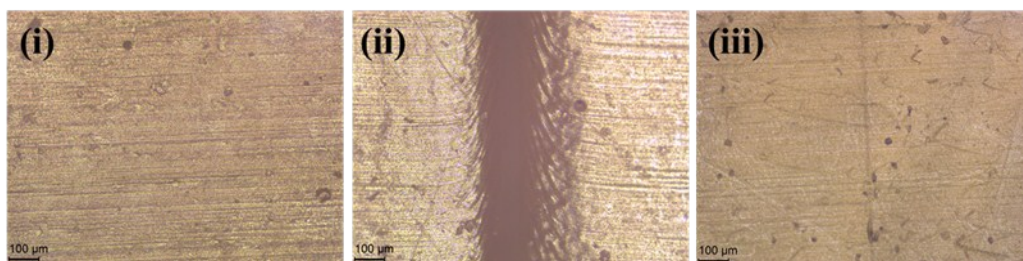

**Figure S3.** Optical microscope images of the sample at (i) original, (ii) damaged, and (iii) healed states.

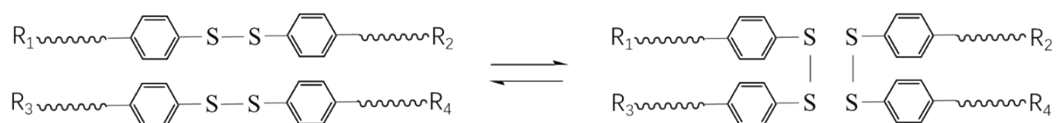

**Figure S4.** Schematic of aromatic disulfide metathesis reaction.

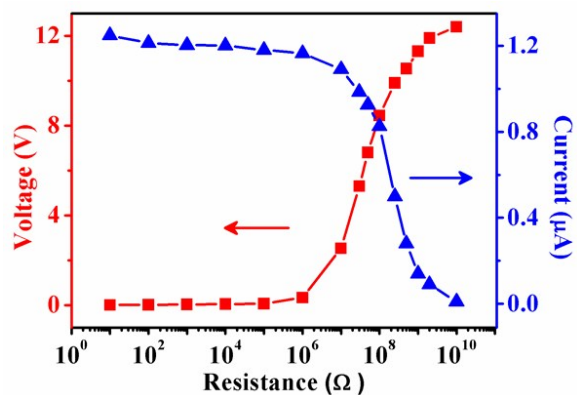

**Figure S5.** Output voltage and current versus the load resistance.

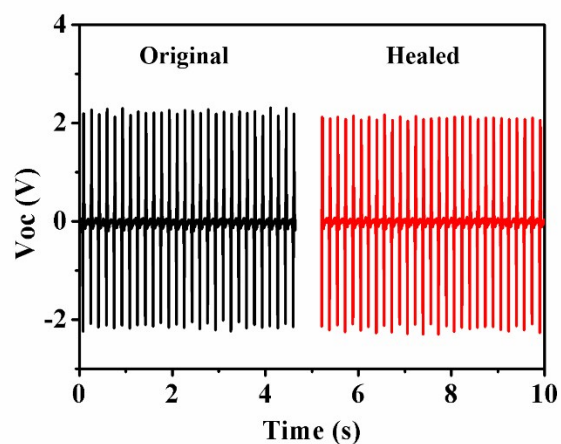

**Figure S6.** The output voltage of the HSP-TENG with Ag electrode at original and healed states.

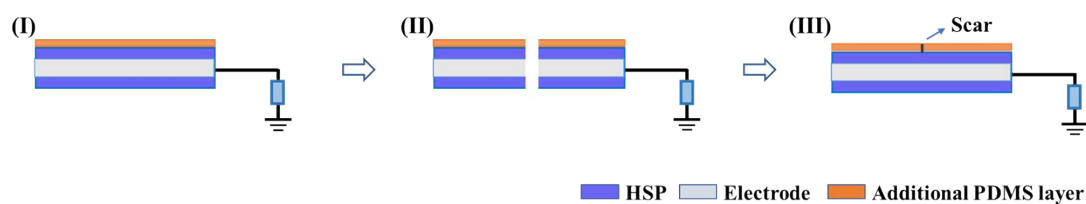

**Figure S7.** The healing process of the HSP-TENG with an additional PDMS layer on the device surface. (I), (II) and (III) represent the original, broken, and healed device, respectively.

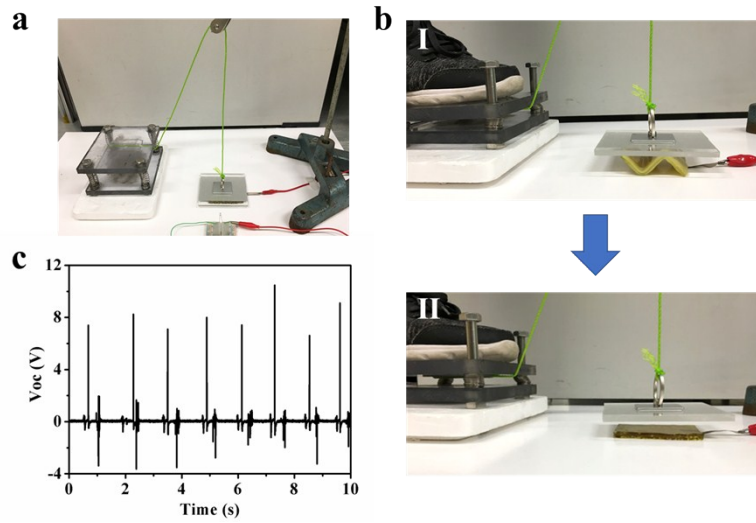

**Figure S8.** (a) Photograph of a prototype of a self-powered fire alarm and escape indicator system based on HSP-TENG with PDMS layer. (b) Photograph of the temperature response process of the self-powered fire alarm and escape indicator system from (I) room temperature to (II) 90 ° C. (c)  $V_{oc}$  generated by the HSP-TENG in self-powered fire alarm and escape indicator system driven by treading on movable floor.
